# Supplementary material for: Clonal relationships in recurrent B-cell lymphomas
Source: PubMed Central journal article supplement (PMC4914290; doi:10.18632/oncotarget.7132), 2016-02-02
Supplement: oncotarget-07-12359-s001.pdf [file oncotarget-07-12359-s001.pdf]

## Clonal relationships in recurrent B-cell lymphomas

### Supplementary Materials

**Supplementary Table S1: Clinical characteristics correlated with clonal relationship**

| Clinical characteristics              |                              | Related ( <i>n</i> = 14) | Unrelated ( <i>n</i> = 3) | <i>P</i> -value |
|---------------------------------------|------------------------------|--------------------------|---------------------------|-----------------|
| Stage                                 | II                           | 3 (21.4%)                | 1 (33.3%)                 | 1               |
|                                       | III                          | 4 (28.6%)                | 0 (0%)                    |                 |
|                                       | IV                           | 7 (50.0%)                | 2 (66.7%)                 |                 |
| Time to relapse (month)               | Median (range)               | 24.5 (4–71)              | 68 (38–100)               | 0.032*          |
| Type of relapse                       | early                        | 3 (21.4%)                | 0 (0%)                    | 1               |
|                                       | late                         | 11(78.6%)                | 3 (100.0%)                |                 |
| Median survival after relapse (month) |                              |                          |                           |                 |
|                                       | FL ( <i>n</i> = 3)           | 40                       | NC                        |                 |
|                                       | CLL/ DLBCL ( <i>n</i> = 1)   |                          | 24                        |                 |
|                                       | MCL/ MCL ( <i>n</i> = 8)     | 37                       | 11                        | 0.5*            |
|                                       | DLBCL/ DLBCL ( <i>n</i> = 5) | 18                       | 1                         | 0.4*            |
| Clinical outcome                      | Alive                        | 8 (57.1%)                | 0 (0%)                    | 0.576           |
|                                       | Dead                         | 6 (42.9%)                | 3 (100%)                  |                 |

\*Mann-Whitney test

Abbreviations: DLBCL, diffuse large B-cell lymphoma; SLL, small lymphocytic lymphoma; MCL, mantle cell lymphoma; FL, follicular lymphoma; NC, non-checkable.
